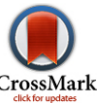

## Correction

# Correction: A Novel Role of the PrpR as a Transcription Factor Involved in the Regulation of Methylcitrate Pathway in *Mycobacterium tuberculosis*

The PLOS ONE Staff

There are errors in the Funding section. The correct funding information is as follows: The research was supported by Wrocław Research Centre EIT+ under the project “Biotechnologies and advanced medical technologies” – BioMed (POIG.01.01.02-02-003/08) financed from the European Regional Development Fund (Operational Programme Innovative Economy, 1.1.2). JZC and PM gratefully acknowledge financial support received from the Foundation for Polish Science (MISTRZ Programme) (<http://www.fnf.org.pl/index.php?lng=en>). The funders had no role in study design, data collection and analysis, decision to publish, or preparation of the manuscript.

## Reference

1. Masiewicz P, Brzostek A, Wolański M, Dziadek J, Zakrzewska-Czerwińska J (2012) A Novel Role of the PrpR as a Transcription Factor Involved in the Regulation of Methylcitrate Pathway in *Mycobacterium tuberculosis*. PLoS ONE 7(8): e43651. doi:10.1371/journal.pone.0043651

**Citation:** The PLOS ONE Staff (2014) Correction: A Novel Role of the PrpR as a Transcription Factor Involved in the Regulation of Methylcitrate Pathway in *Mycobacterium tuberculosis*. PLoS ONE 9(11): e113015. doi:10.1371/journal.pone.0113015

**Published:** November 7, 2014

**Copyright:** © 2014 The PLOS ONE Staff. This is an open-access article distributed under the terms of the Creative Commons Attribution License, which permits unrestricted use, distribution, and reproduction in any medium, provided the original author and source are credited.
